# Supplementary material for: Capacitors Based on Polypyrrole Nanowire Electrodeposits
Source: MDPI journal article supplement (doi:10.3390/polym14245476), 2022-12-14
Supplement: s1 [file s1]

## SUPPLEMENTARY INFORMATION

# Capacitors Based on Polypyrrole Nanowire Electrodeposits

A. M. R. Ramírez <sup>1,2,\*</sup>, M. A. del Valle <sup>3</sup>, E. Ortega <sup>4,5</sup>, F. R. Díaz <sup>3</sup> and M. A. Gacitúa <sup>6,\*</sup>

<sup>1</sup> Centro de Nanotecnología Aplicada, Facultad de Ciencias, Ingeniería y Tecnología, Universidad Mayor, Camino la Pirámide 5750, Santiago 8580745, Chile

<sup>2</sup> Núcleo de Química y Bioquímica, Facultad de Ciencias, Ingeniería y Tecnología, Universidad Mayor, Camino la Pirámide 5750, Santiago 8580745, Chile

<sup>3</sup> Laboratorio de Electroquímica de Polímeros, Pontificia Universidad Católica de Chile, Av. V. Mackenna 4860, Santiago 7820436, Chile

<sup>4</sup> R&D Department, Leitat Chile, Román Díaz 532, Santiago 7500724, Chile

<sup>5</sup> Centro de Excelencia en Nanotecnología (CEN) Chile, Román Díaz 532, Santiago 7500724, Chile

<sup>6</sup> Facultad de Ingeniería & Ciencias, Universidad Diego Portales, Ejército 441, Santiago 8370191, Chile

\* Correspondence: andres.ramirez@umayor.cl (A.M.R.R.); manuel.gacitua@udp.cl (M.A.G.)

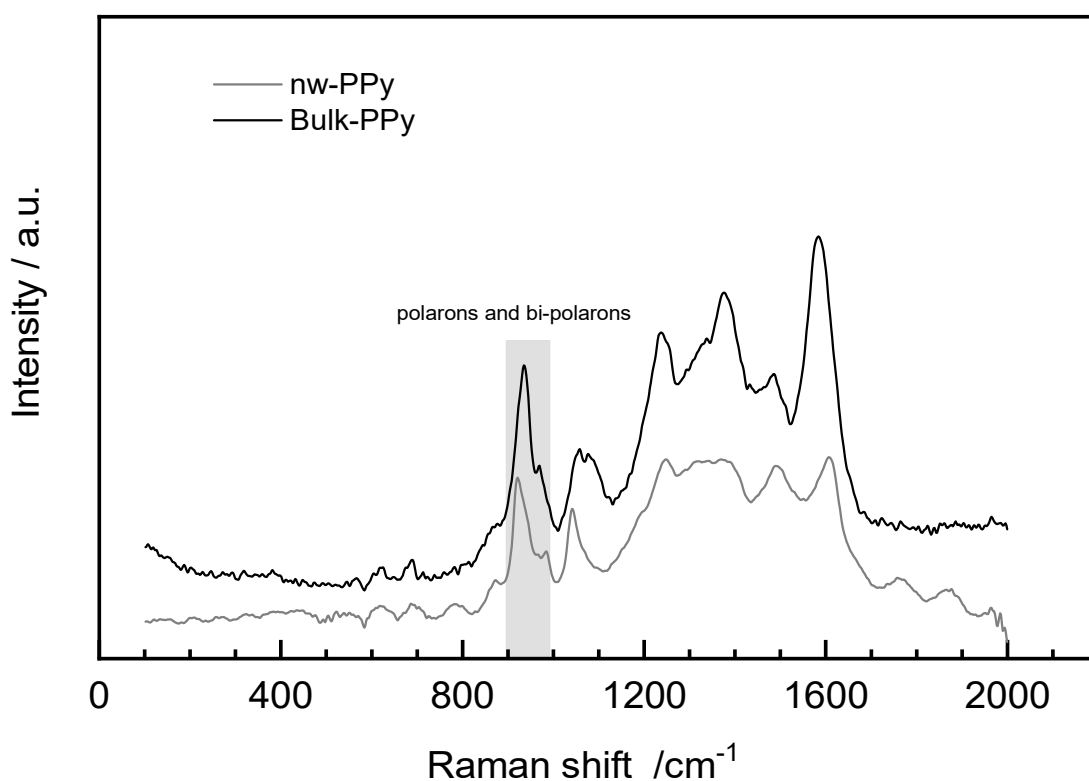

**Figure S1.** Raman spectra of bulk and nanowire PPy ITO modified electrodes.

**Table S1.** Raman spectrum assignments of bulk and nanowire PPy.

| ITO PPy                        |                                                                        | ITO PPy,PPy-nw                 |
|--------------------------------|------------------------------------------------------------------------|--------------------------------|
| wavelength (cm <sup>-1</sup> ) | assignment                                                             | wavelength (cm <sup>-1</sup> ) |
| 1075                           | C–H characteristic                                                     | 1042                           |
| 1246                           | C <sub>α</sub> –N stretching                                           | 1244                           |
| 1337                           | C <sub>α</sub> –C <sub>α</sub> (inter rings between chains) stretching | 1314                           |
| 1379                           | C <sub>β</sub> –C <sub>β</sub> ring stretching                         | 1380                           |
| 1486                           | symmetrical C <sub>α</sub> =C <sub>β</sub> stretching                  | 1490                           |
| 1583                           | asymmetric C <sub>α</sub> =C <sub>β</sub> stretching                   | 1600                           |

**Table S2:** Areas calculated from Raman spectroscopy signals.

|          | 935 cm <sup>-1</sup> | 972cm <sup>-1</sup> | ratio 972/935 | 1600 cm <sup>-1</sup> | ratio 1600/(935 +972) |
|----------|----------------------|---------------------|---------------|-----------------------|-----------------------|
| PPy-Bulk | 12.5303              | 9.8064              | 0.783         | 28.0493               | 1.256                 |
| PPy-Nw   | 6.2162               | 5.5577              | 0.895         | 15.067                | 1.280                 |

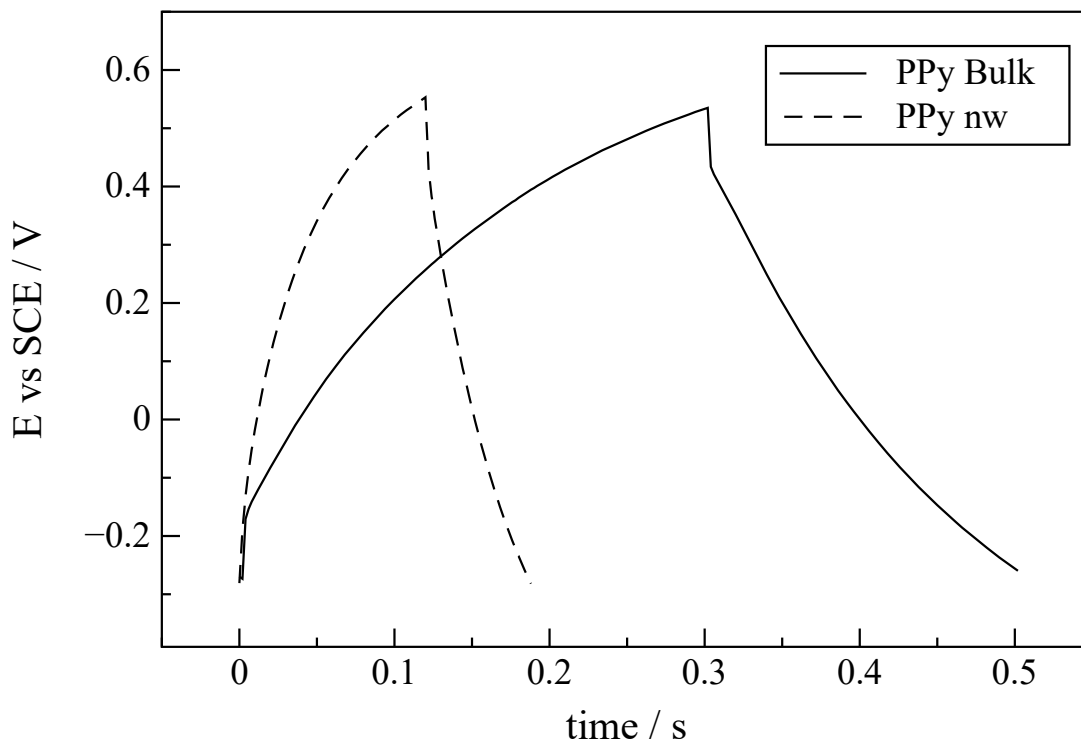**Figure S2.** Galvanostatic measurements of charge and discharge of bulk and nanowired PPy deposits in 0.100 mol L<sup>-1</sup> LiCl at 0.15 mA.

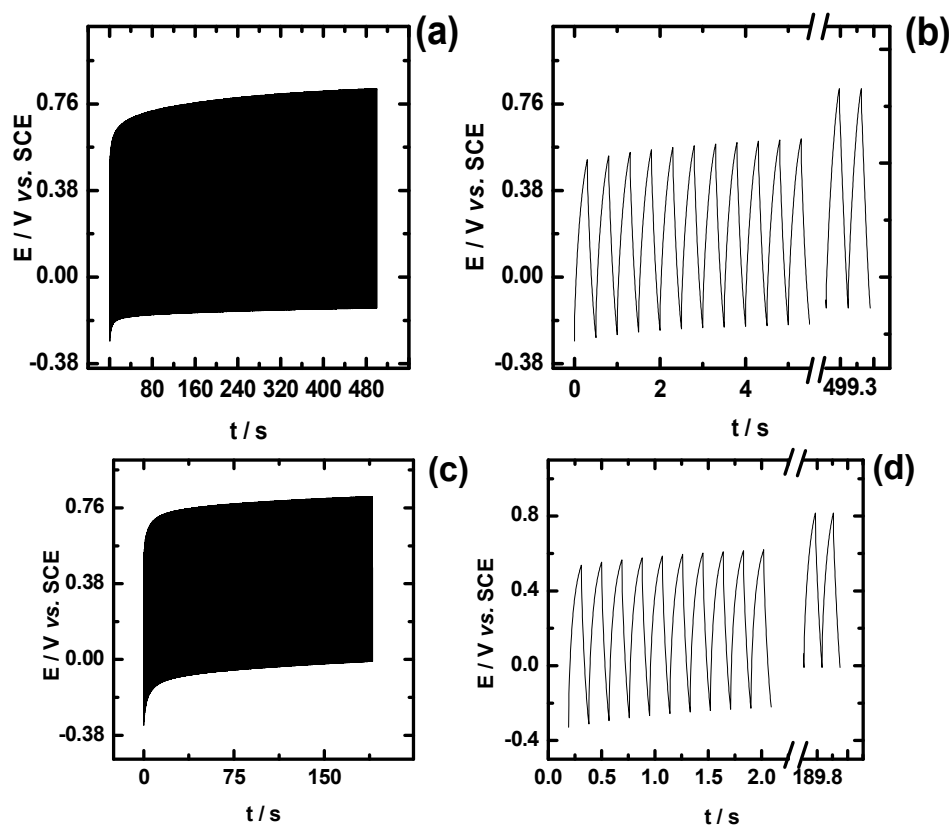

**Figure S3.** Galvanostatic measurements of charge and discharge in 0.100 mol L<sup>-1</sup> LiCl: (a,b) PPy bulk, and (c,d) PPy-nw for  $i = 0.15$  mA.

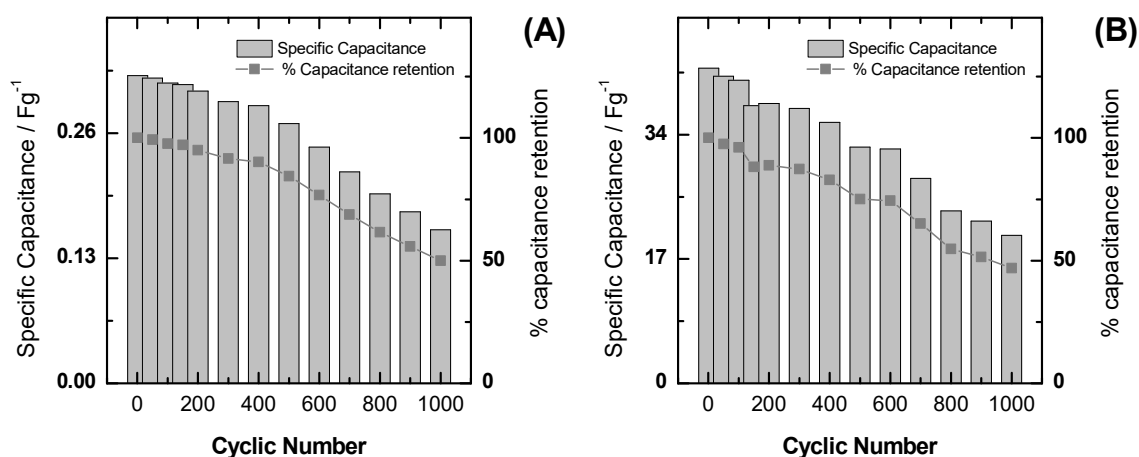

**Figure S4.** Graphic representation of specific capacitance and % of capacitance retention vs. number of charge/discharge cycles obtained by cyclic voltammetry in 0.1 mol L<sup>-1</sup> aqueous LiCl solution for 1000 successive cycles: (a) ITO|PPy, and (b) ITO|PPy,PPy-nw.
